# Supplementary material
Source: PubMed Central journal article supplement (PMC11046401)
Supplement: jama-e244459-s002.pdf [file jama-e244459-s002.pdf]

## Data Sharing Statement

McKetta. Disparities in Mortality by Sexual Orientation in a Large, Prospective Cohort of Female Nurses. *JAMA*. Published April 25, 2024. doi:10.1001/jama.2024.4459

### Data

**Data available:** Yes

**Data types:** Deidentified participant data

**How to access data:** Data are available by request. Instructions on accessing data are available at <https://nurseshealthstudy.org/researchers>

**When available:** With publication

### Supporting Documents

**Document types:** None

### Additional Information

**Who can access the data:** Researchers whose proposed use of the data has been approved

**Types of analyses:** Secondary analysis of these data available for any purpose subject to co-investigator approval

**Mechanisms of data availability:** Data will be available after approval of a proposal and with a signed data access agreement
